# Supplementary material for: Dynamics of Li4Ti5O12/sulfone-based electrolyte interfaces in lithium-ion batteries
Source: Royal Society of Chemistry journal article supplement (doi:10.1039/c3cp54862g), 2014-01-01
Supplement: c3cp54862g.pdf [file c3cp54862g.pdf]

## Supplementary material

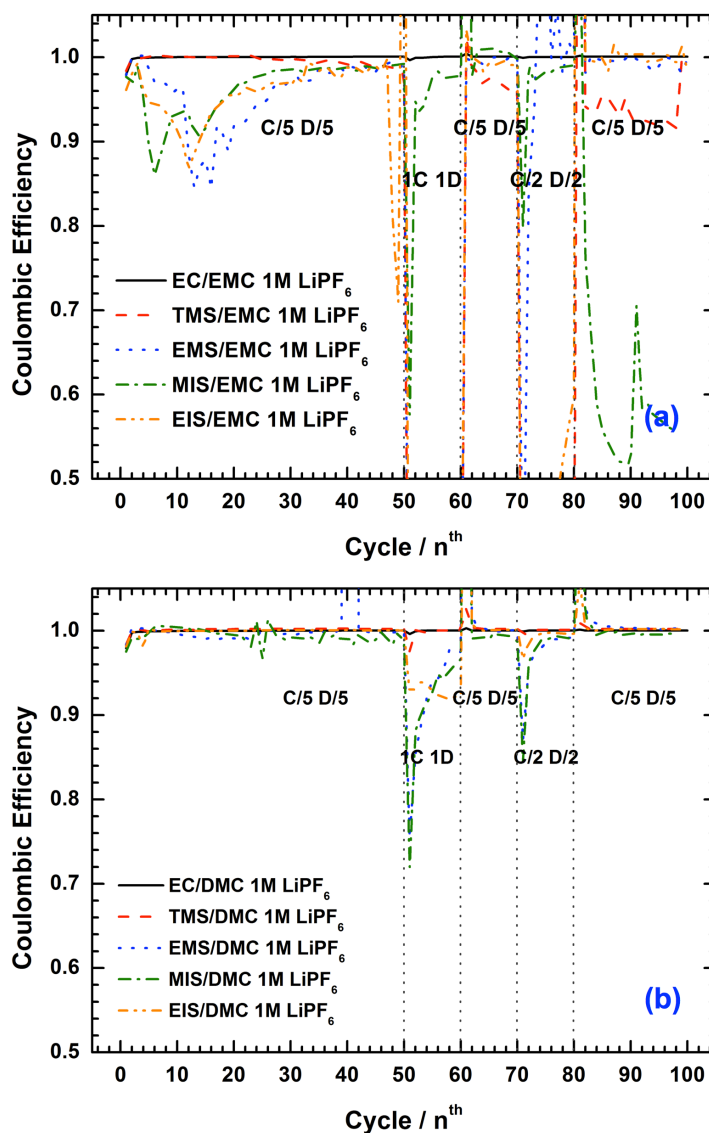

Fig. S1 Coulombic efficiency ( $Q_{\text{lithiation}}/Q_{\text{delithiation}}$ ) versus cycling rate at  $20.0 \pm 0.3^\circ\text{C}$  of the LTO/Li for the five (a) EMC- and (b) DMC-based electrolytes.

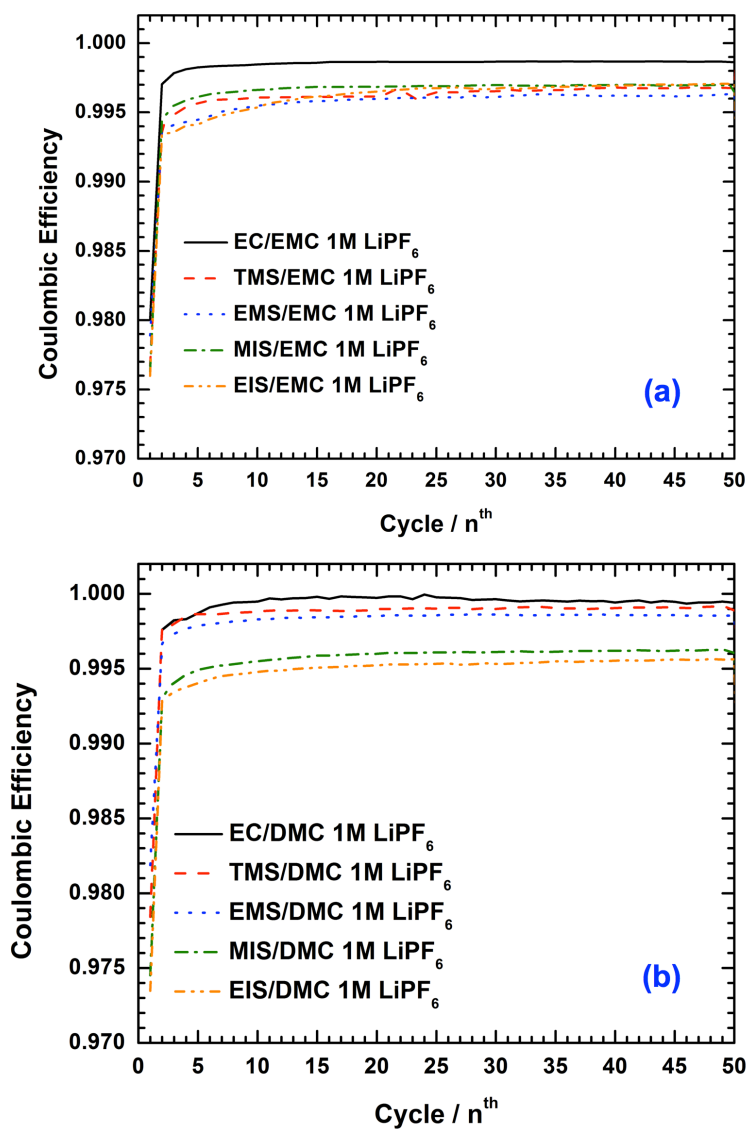

Fig. S2 Coulombic efficiency ( $Q_{\text{lithiation}}/Q_{\text{delithiation}}$ ) during the first 50 cycles at the C/5 D/5 rate of the LTO/LTO symmetric cells at  $20.0 \pm 0.3^\circ\text{C}$  using the five (a) EMC- and (b) DMC-based electrolytes.
